# Supplementary material for: A local polarization strategy for efficient sacrificial-free hydrogen peroxide photoproduction
Source: Royal Society of Chemistry journal article supplement (doi:10.1039/d6sc00783j), 2026-04-20
Supplement: d6sc00783j1.pdf [file d6sc00783j1.pdf]

## Supporting Information

# Local Polarization Strategy for Efficient Sacrificial-free Hydrogen Peroxide Photoproduction

*Donghui Wang, Jin-Gang-Lu Tao, Hai yang Zhang, Po Zhang and Feng Chen\**

### 1. Experimental section

#### 1.1 Materials

1,3,5-triformylphloroglucinol (Tp), 2,4-diamino-1,3,5-triazine (Tz), 4,6-diaminopyrimidine (Da), 2,4-diaminopyridine (Py), and m-phenylenediamine (Ma) were purchased from Bide Pharmatech Co., Ltd. 1,4-Dioxane, mesitylene, acetic acid, N,N-dimethylformamide (DMF), methanol, Nafion (5 wt%), sodium sulfate ( $\text{Na}_2\text{SO}_4$ ), potassium hydrogen phthalate, potassium iodide (KI), sodium iodate ( $\text{NaIO}_3$ ), EDTA disodium salt (EDTA-2Na), nitroblue tetrazolium (NBT), silver nitrate ( $\text{AgNO}_3$ ), and tert-butanol (tBA) were obtained from Sinopharm Chemical Reagent Co., Ltd. DMPO was supplied by Dojindo Chemical Technology Co., Ltd. All aqueous solutions used in the experiments were prepared using ultrapure water ( $18.2\text{M}\Omega\cdot\text{cm}$ ).

#### 1.2 Synthesis of COFs

The COFs were synthesized via a one-pot procedure by Schiff base reaction with Tp and four diamines (Tz, Da, Py, and Ma) as the precursors. Typically, 0.2 mmol Tp and 0.3 mmol diamines were added into a Schlenk tube. Then, 1.5 mL mesitylene, 1.5 mL 1,4-Dioxane, and 0.3 mL 6 M AcOH mixture solution was added into the Schlenk tube, which was degassed by three freeze-pump-thaw cycles. The tube was sealed and heated at  $120\text{ }^\circ\text{C}$  for 72 h. The precipitate was collected by centrifugation and washed with DMF,  $\text{H}_2\text{O}$  and MeOH to remove unreacted precursors and oligomers. Finally, TpTz, TpDa, TpPy, and TpMa were obtained after being dried at  $60\text{ }^\circ\text{C}$  overnight.

#### 1.3 Material characterization

X-ray diffraction (XRD) data were measured on Bruker D2 Phaser X-ray diffractometer ( $\lambda = 0.154\text{ nm}$ ). The lattice patterns and morphology of the samples were observed using a transmission electron microscope (TEM, Talos F200X) and a scanning electron microscope

(SEM, Helios G4 UC). Fourier-transform infrared (FTIR) spectra were recorded on a Nicolet 380 infrared spectrometer in the range of 4000-400  $\text{cm}^{-1}$ . The solid-state  $^{13}\text{C}$  nuclear magnetic resonance (SSNMR) spectra were recorded on Bruker AVANCE NEO 500 M spectrometer. The contents of C and N elements were detected using element analyzer (EA, Elementar Vario EL). The absorbance of  $\text{I}_3^-$  solution was measured using a Shimadzu ultraviolet-visible spectrophotometer (UV-2600) and diffuse reflectance spectroscopy (DRS) was performed in the range of 200 to 800 nm with  $\text{BaSO}_4$  as the reference. X-ray photoelectron spectroscopy (XPS) was conducted using a Thermo Fisher ESCALAB 250Xi instrument with Al  $K\alpha$  excitation source, and internal calibration was performed using the C1s binding energy (BE) from carbon contaminants at 284.8 eV. Photoluminescence (PL) were monitored using a fluorescence spectrometer (Edinburgh Instruments FLS980). Thermogravimetric (TG) analysis was performed on a TA Discovery 5500 instrument. Electron paramagnetic resonance (EPR) measurements were carried out on an EPR spectrometer (Bruker BioSpin GmbH) using DMPO as a radical capture reagent. The Brunauer-Emmett-Teller (BET) surface area and pore structure were analyzed by 3FLEX 3500. The in-situ DRIFTS were recorded on Bruker VERTEX 80v.

#### **1.4 Photocatalytic tests**

The catalyst (3 mg) was introduced into a 50 mL quartz reactor, followed by the addition of pure water (30 mL) to achieve homogeneous dispersion of the catalyst via 5 min of ultrasonication. Subsequently, the dispersion was saturated with  $\text{O}_2$  under dark conditions through continuous injection of  $\text{O}_2$  ( $50 \text{ mL min}^{-1}$ ) for 30 min. The reaction mixture was then subjected to irradiation under a Xe lamp (CEL-LAX) with sustained  $\text{O}_2$  purging for photocatalytic evaluation. Throughout the experiment, the solution was maintained under magnetic agitation at 1200 rpm. Aliquots (1.5 mL) were sampled at 30-min intervals, with photocatalyst removal accomplished via centrifugal filtration.

The amount of  $\text{H}_2\text{O}_2$  was determined using the iodine titration method. A solution of 1.0 ml  $0.4 \text{ mol L}^{-1}$  potassium iodide (KI) and 1.0 ml  $0.1 \text{ mol L}^{-1}$  potassium hydrogen phthalate ( $\text{KC}_8\text{H}_5\text{O}_4$ ) was added to 1.0 ml of the  $\text{H}_2\text{O}_2$  sample solution, and the solution was allowed to stand for 30 min.  $\text{H}_2\text{O}_2$  reacted with  $\text{I}^-$  under acidic conditions to form  $\text{I}_3^-$  ( $\text{H}_2\text{O}_2 + 3\text{I}^- + 2\text{H}^+ \rightarrow \text{I}_3^- + 2\text{H}_2\text{O}$ ), which exhibited strong absorption at around  $350 \text{ nm}^{-1}$ . The content of  $\text{I}_3^-$  was determined by

measuring the absorbance at 350 nm using ultraviolet-visible spectrophotometry. This allowed for the calculation of the total amount of H<sub>2</sub>O<sub>2</sub> generated during the reaction.

### 1.5 Apparent quantum yield measurement

The apparent quantum yield (AQY) produced by H<sub>2</sub>O<sub>2</sub> was tested using filters with center wavelengths of 400 nm, 450 nm, 500 nm, 550 nm, and 600 nm. The concentration of photocatalyst in the reaction solution was 0.33 g L<sup>-1</sup>. The irradiation area was controlled at 0.385 cm<sup>2</sup>, and the light intensity was measured using an optical densitometer. The AQY was calculated using the following formula:

$$\eta = \frac{N_e}{N_p} \times 100\% = \frac{2 \times M \times N_A \times h \times c}{S \times P \times t \times \lambda} \times 100\%$$

Where,  $M$  represents the number of H<sub>2</sub>O<sub>2</sub> molecules produced,  $N_A$  is Avogadro's constant,  $h$  is Planck's constant,  $c$  is the speed of light,  $S$  is the irradiation area,  $P$  is the irradiation light intensity,  $t$  is the duration of the light reaction, and  $\lambda$  is the wavelength of the incident monochromatic light.

### 1.6 SCC efficiency (%) measurement

The SCC efficiency (%) was evaluated under AM 1.5 G light illumination according to the following equation:

$$\text{SCC efficiency (\%)} = \frac{[\Delta G \text{ for H}_2\text{O}_2 \text{ generation (J mol}^{-1}\text{)}][\text{H}_2\text{O}_2 \text{ formed (mol)}]}{[\text{total input energy (W)}][\text{reaction time (s)}]} \times 100$$

The free energy ( $\Delta G$ ) for H<sub>2</sub>O<sub>2</sub> generation is 117 kJ mol<sup>-1</sup>.

The H<sub>2</sub>O<sub>2</sub> generation rate is 1.72\*10<sup>-5</sup> mol per hour, with an irradiated area of 0.385 cm<sup>2</sup> and a light intensity of 270 mW cm<sup>-2</sup> as measured by a photodensitometer. Substituting these values into the formula yields an SCC efficiency of 0.54%.

### 1.7 (Photo)electrochemical measurement

Transient photocurrent ( $I-T$ ) and electrochemical impedance spectroscopy (EIS) measurements were conducted on a CHI760E electrochemical workstation (Shanghai CH Instruments Co., Ltd.) equipped with a standard three-electrode system. Ag/AgCl electrode (saturated KCl), platinum foil electrode, and indium tin oxide (ITO) glass electrode (1.0\*2.0 cm) were used as reference electrode, counter electrode, and working electrode, respectively. The

preparation process of the working electrode is as follows: 2.0 mg of the prepared catalyst was dispersed in a mixture solution of ethanol (95  $\mu\text{L}$ ), water (95  $\mu\text{L}$ ), and Nafion (10  $\mu\text{L}$ ) by ultrasonication. Then, 100  $\mu\text{L}$  of the suspension was drop-casted onto the ITO electrode, controlling the electrode area to be 1  $\text{cm}^2$ . After natural cooling, the electrode was dried under an infrared lamp for 5 minutes. A xenon lamp (300 W, CEL-PF300-T8) was used as the light source, and  $\text{NaSO}_4$  (0.20 M) was used as the electrolyte. Under open-circuit voltage, photocurrent was collected every 20 s. Electrochemical impedance spectroscopy was performed at a DC voltage of -0.5 V (vs. Ag/AgCl), with an AC voltage amplitude of 5 mV and a frequency range from 100 kHz to 0.01 Hz.

The transfer electron number ( $n$ ) and  $\text{H}_2\text{O}_2$  selectivity of the samples in the ORR reaction were measured using a rotating ring-disk electrode (RRDE) setup<sup>2, 3</sup>. The electrochemical measurements were conducted in a three-electrode system with RRDE as the working electrode, Ag/AgCl as the reference electrode, and a platinum ring as the counter electrode. A phosphate buffer solution (0.1 M pH = 6.9) saturated with  $\text{O}_2$  was used as the electrolyte. The RRDE rotation speed was set to 2500 rpm, and the potential range was set from -1.0 to 0.5 V (vs. Ag/AgCl) with a scan rate of 10 mV/s. Prior to electrochemical performance testing, the working electrode was cyclic voltammetry (CV) scanned at a scan rate of 50 mV/s until the curve stabilized. The catalyst ink on the RRDE working electrode was prepared as follows: A total of 5 mg of the sample was combined with 0.5 mL of ethanol, 0.5 mL of water, and 50  $\mu\text{L}$  of Nafion solution, and the resulting mixture was ultrasonicated for 20 min to achieve a homogeneous dispersion. Subsequently, 10  $\mu\text{L}$  of this uniform dispersion was drop-cast onto a clean glassy carbon electrode and allowed to air-dry at room temperature prior to testing.

The number of transferred electrons was calculated according to the following equation:

$$n = 4 \times \frac{I_d}{I_d + I_r/N}$$

The selectivity was determined by the following equation:

$$\%(\text{H}_2\text{O}_2) = 200 \times \frac{I_r/N}{I_d + I_r/N}$$

Where  $I_d$  is the disk current,  $I_r$  is the ring current, and  $N$  is the collection efficiency (0.37).

### 1.8 Probing WOR and ORR with low-concentration electron acceptor

To further probe the relationship between WOR and ORR, we adopted a quantitative strategy using a low concentration of  $\text{Ag}^+$  (0.1 mM) as an electron acceptor under  $\text{O}_2$ -free conditions, following previously reported approaches<sup>4</sup>. In this configuration, photogenerated electrons are initially consumed by  $\text{Ag}^+$  reduction, while holes drive water oxidation to produce  $\text{O}_2$ . Once  $\text{Ag}^+$  is depleted, the  $\text{O}_2$  generated from WOR can subsequently participate in ORR to form  $\text{H}_2\text{O}_2$ . Thus, the amount of  $\text{H}_2\text{O}_2$  produced can be correlated with the  $\text{O}_2$  generated via WOR.

The quantification principle is described as follows. We made the following assumptions:

- (1) all added  $\text{Ag}^+$  ( $4n$  mol) is completely consumed to provide holes that generate the initial  $\text{O}_2$  ( $n$  mol);
- (2) the COFs then reduce  $\text{O}_2$  ( $n$  mol) to form  $\text{H}_2\text{O}_2$  ( $n$  mol) while simultaneously oxidizing  $\text{H}_2\text{O}$  ( $n$  mol) to generate fresh  $\text{O}_2$  ( $1/2 n$  mol);
- (3) the  $\text{O}_2$  generated in step (2) continues to participate in  $\text{H}_2\text{O}_2$  production and WOR, generating additional  $\text{O}_2$  ( $1/4 n$ ,  $1/8 n$ ,  $1/16 n \dots$  mol) until all  $\text{O}_2$  is consumed.

Accordingly, the amount of  $\text{H}_2\text{O}_2$  produced from the initially generated  $\text{O}_2$  can be calculated as:

$$n_{\text{H}_2\text{O}_2} = \sum_{k=1}^x n_{\text{O}_2} r^{k-1} = \frac{n_{\text{O}_2}(1-r^x)}{1-r}$$

where  $n_{\text{H}_2\text{O}_2}$  is the generated amount of  $\text{H}_2\text{O}_2$ ,  $n_{\text{O}_2}$  is the amount of generated  $\text{O}_2$  by  $\text{Ag}^+$ ,  $r$  is  $1/2$ ,  $k$  is number of reaction cycles for simultaneous  $\text{H}_2\text{O}_2$  production and WOR. If the initial  $\text{O}_2$  generated by  $\text{Ag}^+$  ( $k = 1$ ) was all consumed for  $\text{H}_2\text{O}_2$  production (i.e.,  $k$  equals to  $\infty$ ), the total amount of  $\text{H}_2\text{O}_2$  produced would be 2 times the amount of  $\text{O}_2$  ( $k = 1$ ) and  $1/2$  times the amount of added  $\text{Ag}^+$ .

### 1.9 In-situ Diffuse Reflectance Infrared Fourier Transform Spectra (DRIFTS) Analysis

The sample was placed in in-situ cell.  $\text{H}_2\text{O}$  vapors and  $\text{O}_2$  were introduced in the cell. After the sample reached an adsorption-desorption equilibrium within 30 min, the DRIFTS were test under the visible light irradiation.

## 2. Computational details

First-principles DFT calculations were performed using the Vienna ab initio simulation package

(VASP)<sup>5, 6</sup> and the projector augmented wave (PAW) method<sup>7</sup>. The exchange- correlation effects were treated in generalized gradient approximation (GGA) with the Perdew-Burke-Ernzerhof (PBE) potential<sup>8</sup>. The kinetic energy cutoff was chosen to be 500 eV. The electronic energy was considered self-consistent when the energy change was smaller than 10<sup>-6</sup> eV. A geometry optimization was considered convergent when the force change was smaller than 0.02 eV/Å. Grimme's DFT-D3 methodology was used to describe the dispersion interactions<sup>9</sup>. The adsorption energy ( $E_{ads}$ ) was defined as:

$$E_{ads} = E_{ad/sub} - E_{ad} - E_{sub}$$

where  $E_{ad/sub}$ ,  $E_{ad}$ , and  $E_{sub}$  are the total energies of the optimized adsorbate/substrate system, the adsorbate in the gas phase, and the clean substrate, respectively.

The free energy ( $G$ ) for elemental reaction step were calculated as:

$$G = E + ZPE - TS + H(T)$$

where  $E$  is the total energy calculated by *DFT*,  $ZPE$  is the zero point energy,  $T$  is the temperature (298.15 K),  $S$  represents the entropy, and  $H(T)$  means enthalpy<sup>1</sup>. The zero energy and entropy of the adsorbed substance are calculated based on the frequency of vibration. The free energy of H<sub>2</sub>O and H<sub>2</sub> is calculated from the gas phase H<sub>2</sub>O at 0.035 bar and H<sub>2</sub> at 298.15 K at 1 bar. The free energy of O<sub>2</sub> is calculated using the following equation:

$$G(O_2) = G(H_2O) - 2G(H_2) + 4.92\text{eV}.$$

Time-dependent density functional theory (TD-DFT) calculations were performed using the B3LYP/6-311G(d) method and basis set with the ORCA program.<sup>10</sup> Analysis and visualization of hole and electron distribution were performed by Multiwfn<sup>11</sup> based on an efficient algorithm and filled with colors using VMD<sup>12</sup>.

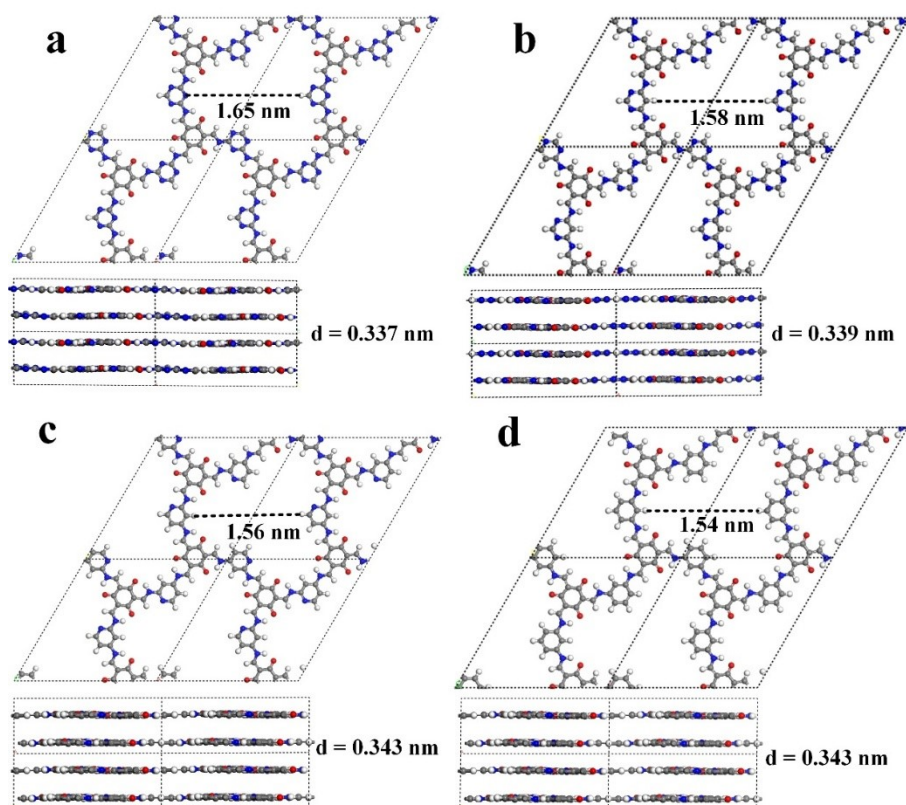

**Figure S1.** Stacking model structures of COFs. AA stacking model structures of (a) TpTz, (b) TpDa, (c) TpPy, and (d) TpMa from the top and side views.

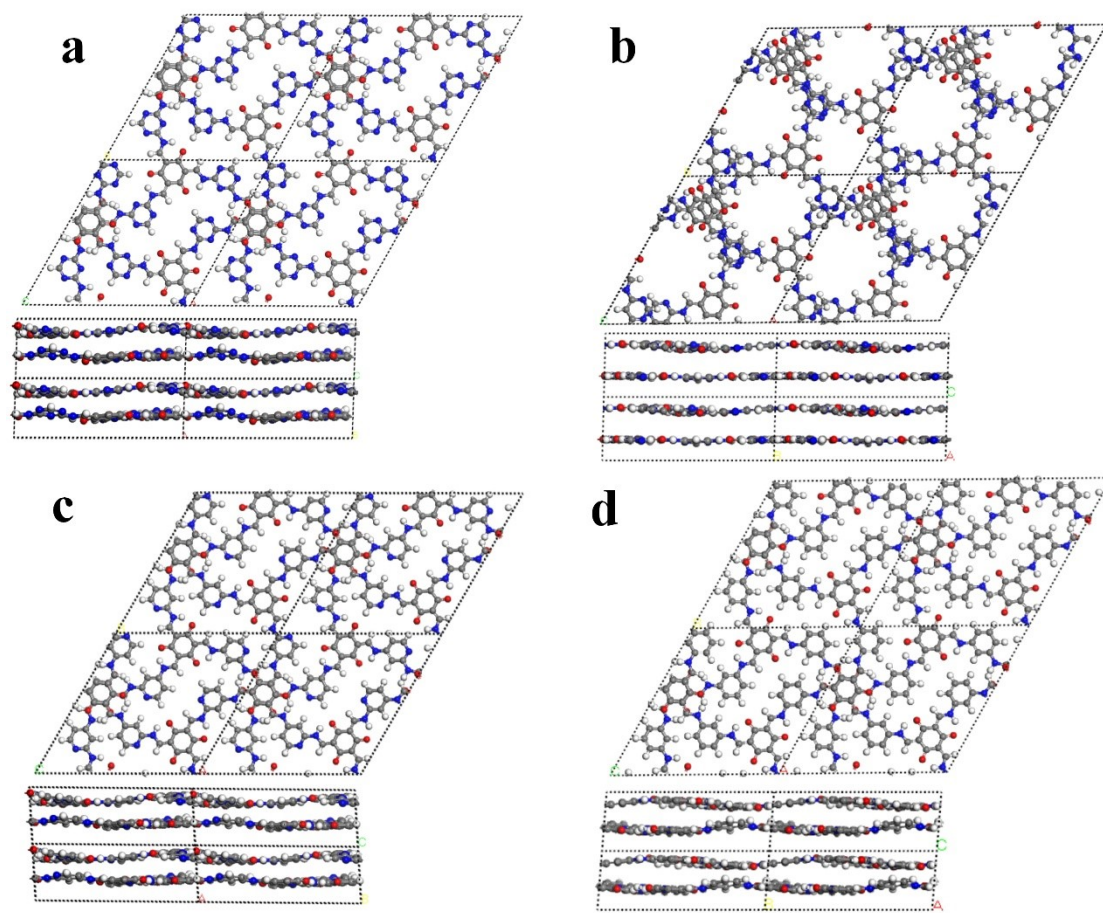

**Figure S2.** Stacking model structures of COFs. AB stacking model structures of (a) TpTz, (b) TpDa, (c) TpPy, and (d) TpMa from the top and side views.

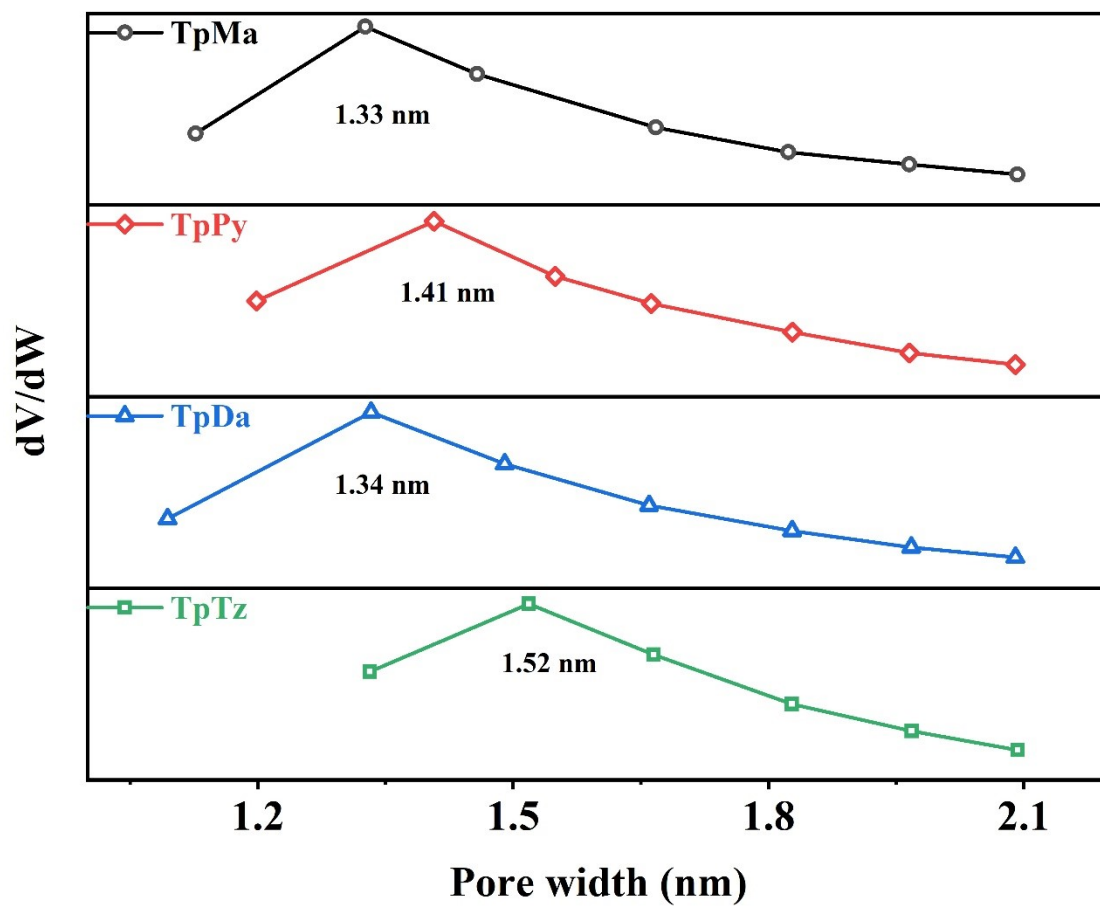

Figure S3. Pore size distributions of COFs.

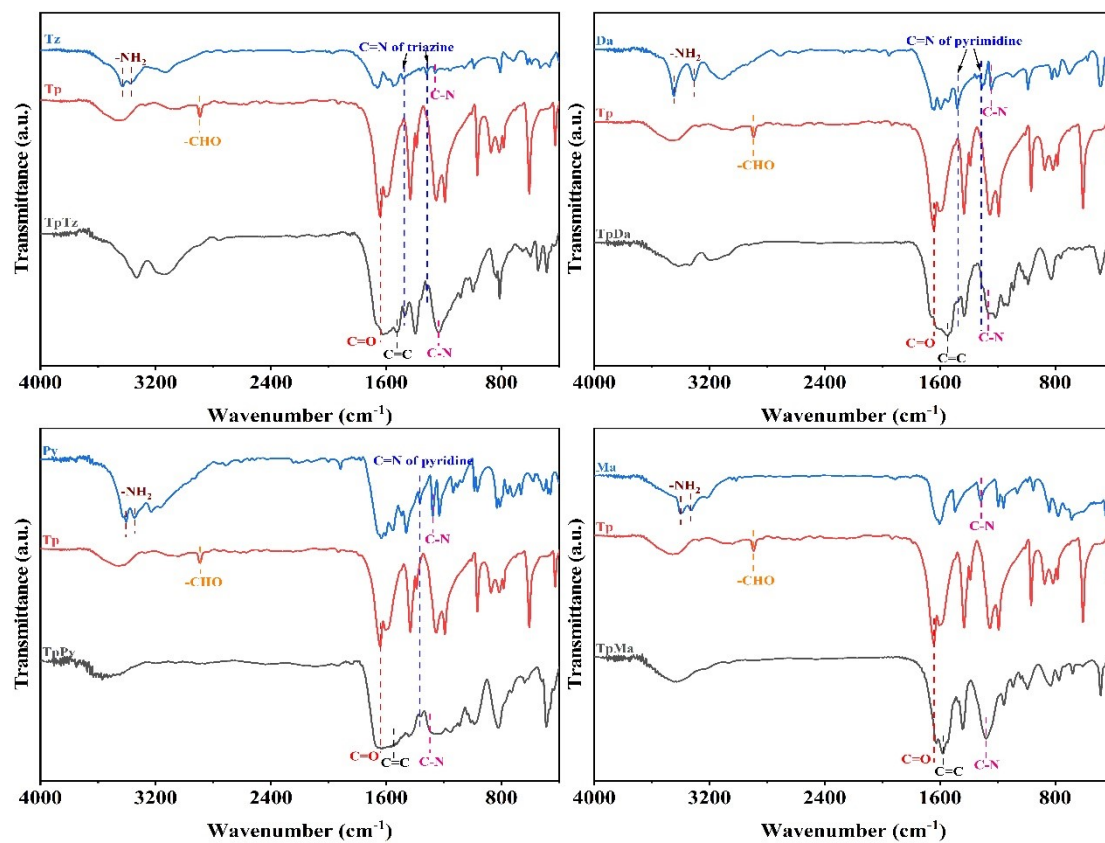

**Figure S4.** Fourier transform infrared (FT-IR) spectroscopy for Tp, diamine and COFs.

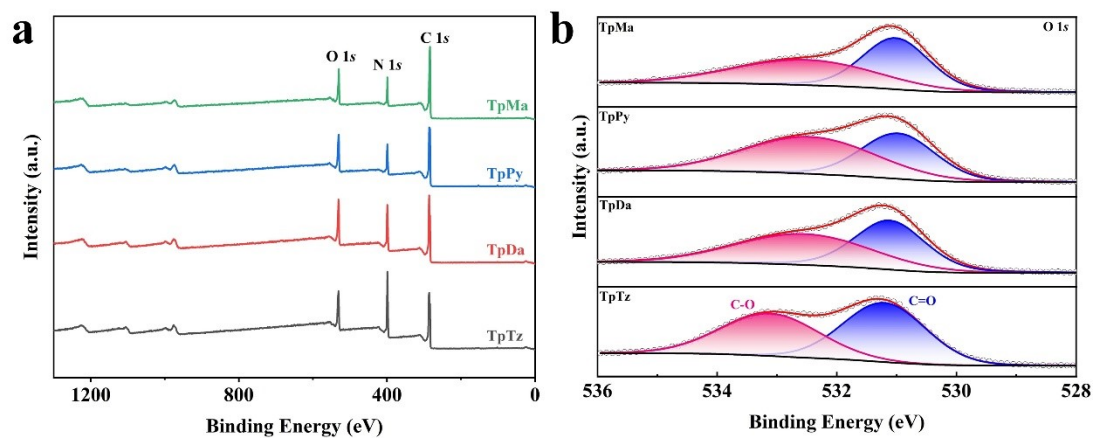

**Figure S5.** (a) XPS surveys of COFs. (b) O 1s XPS spectra of COFs.

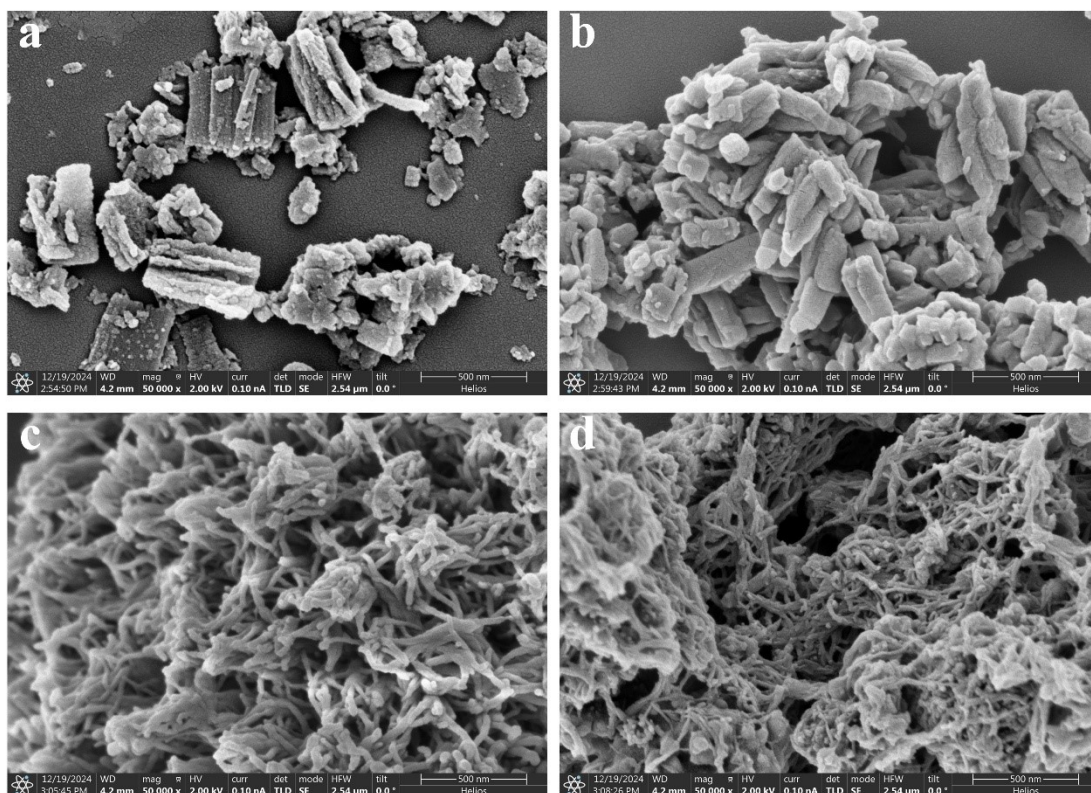

**Figure S6.** SEM images of (a) TpTz, (b) TpDa, (c) TpPy and (d) TpMa.

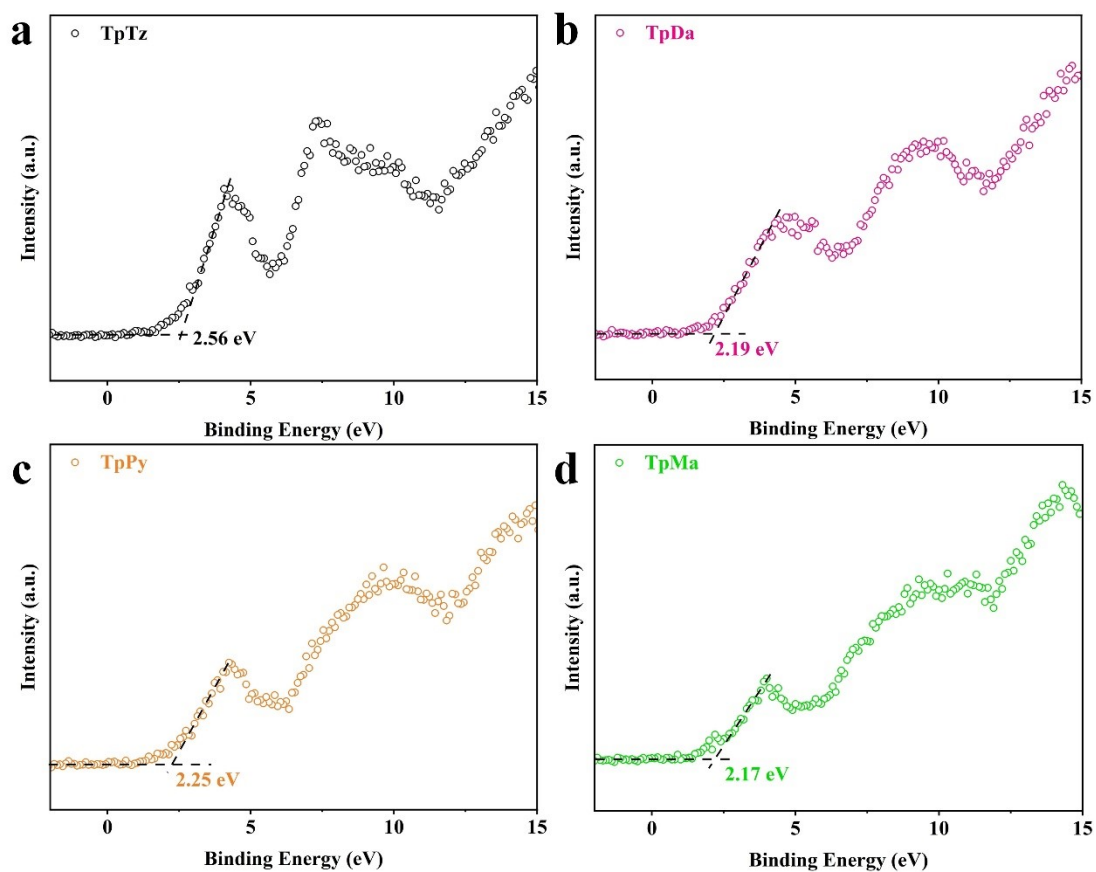

**Figure S7.** VB-XPS spectra of (a) TpTz, (b) TpDa, (c) TpPy and (d) TpMa.

The valence band maximums (VBM) versus normal hydrogen electrode (NHE) were estimated by the formula  $E_{\text{NHE}}/V = E + \Phi - 4.5$  ( $E$ : electrode potential measured by VB-XPS;  $\Phi$  of 4.20 eV: the electron work function of the analyzer).

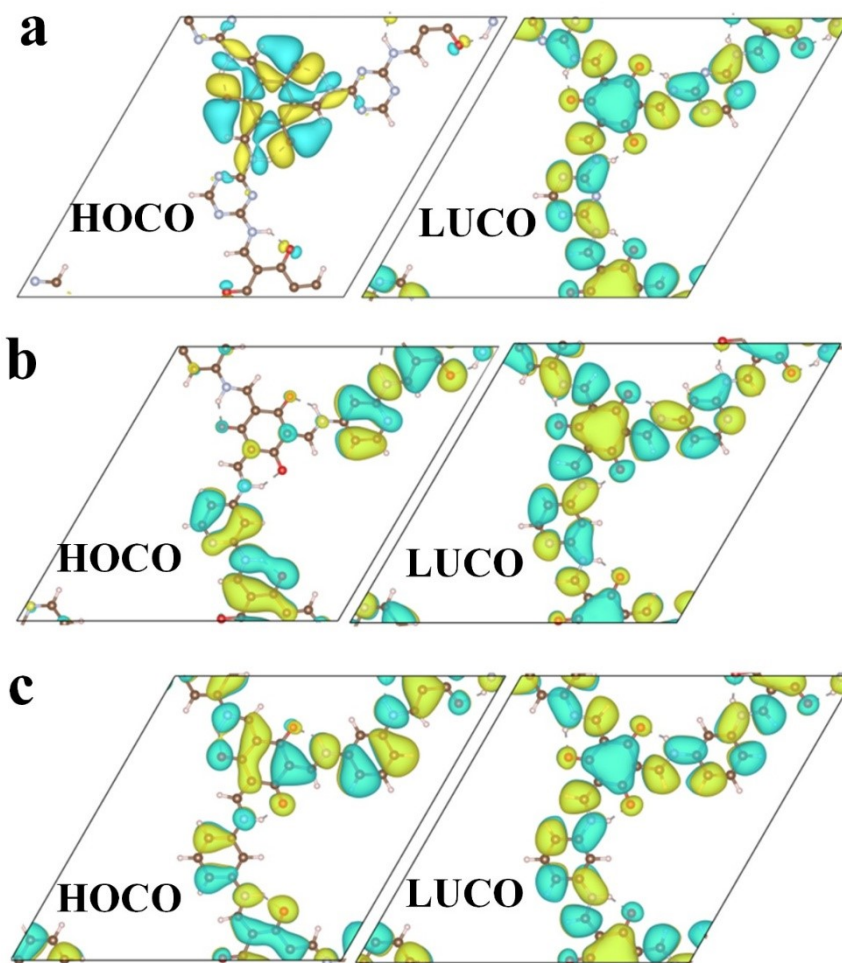

**Figure S8.** HOCO and LUCO distribution of (a) TpTz, (b) TpPy and (c) TpMa.

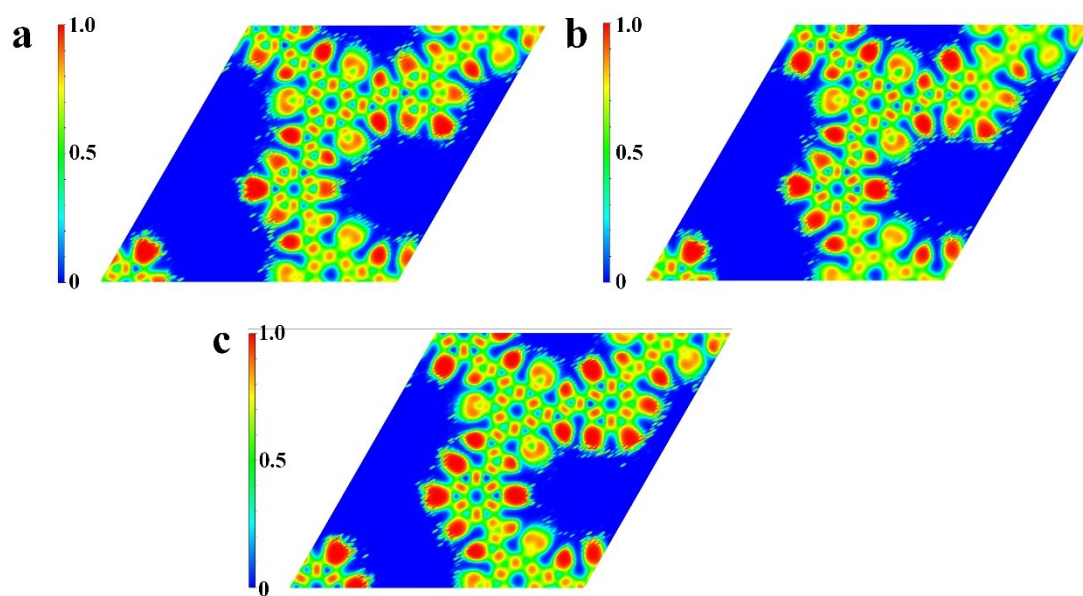

**Figure S9.** The calculated Electron Localization Function (ELF) diagrams of (a) TpTz, (b) TpPy and (c) TpMa. Red and blue represent complete localization and complete delocalization of electrons, respectively.

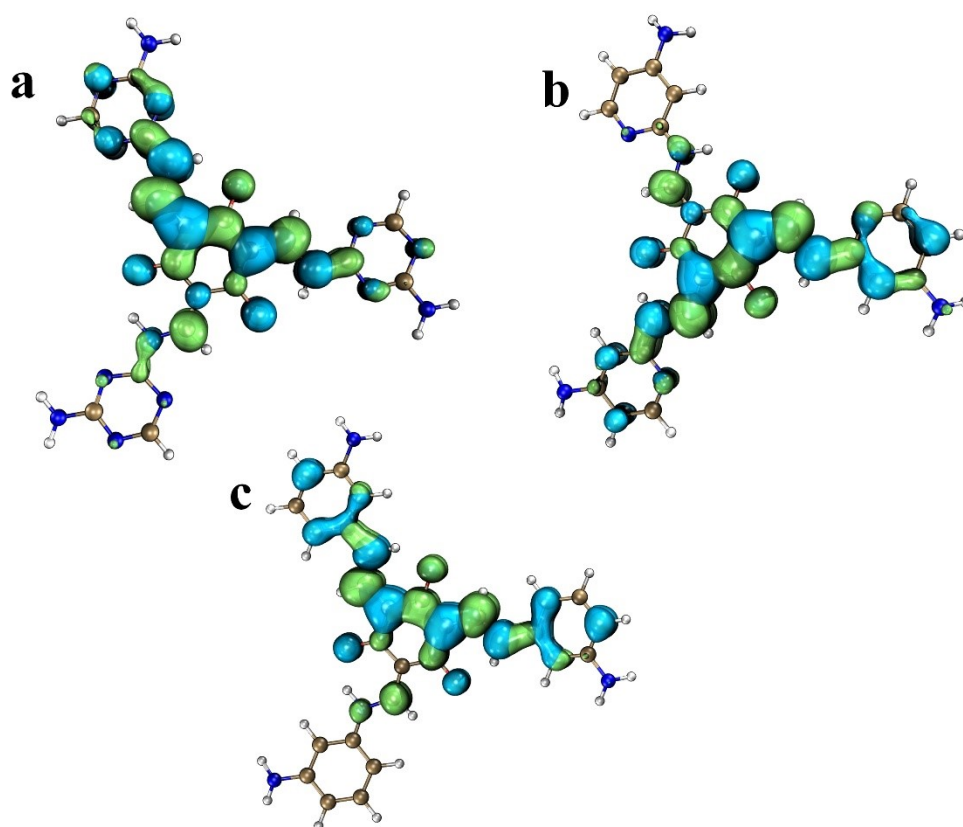

**Figure S10.** Distribution of holes (blue) and electrons (green) in (a) TpTz, (b)TpPy and (c) TpMa obtained through the time-dependent density functional theory (TD-DFT) calculations (Isosurface value = 0.001).

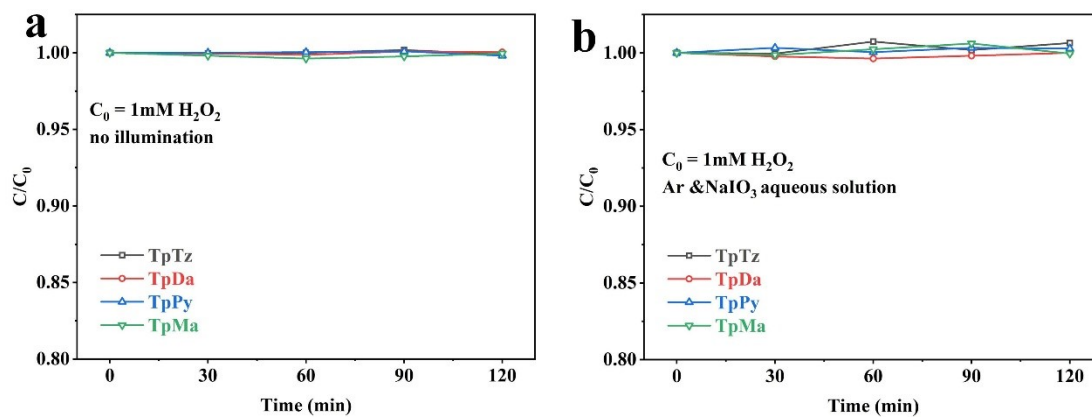

**Figure S11.** (a) Photocatalytic decomposition of H<sub>2</sub>O<sub>2</sub> ( $C_0 = 1 \text{ mM}$ ) under dark conditions over COFs. (b) Photocatalytic decomposition of H<sub>2</sub>O<sub>2</sub> ( $C_0 = 1 \text{ mM}$ ) in NaIO<sub>3</sub> aqueous solution (20 mM) under Ar atmosphere over COFs.

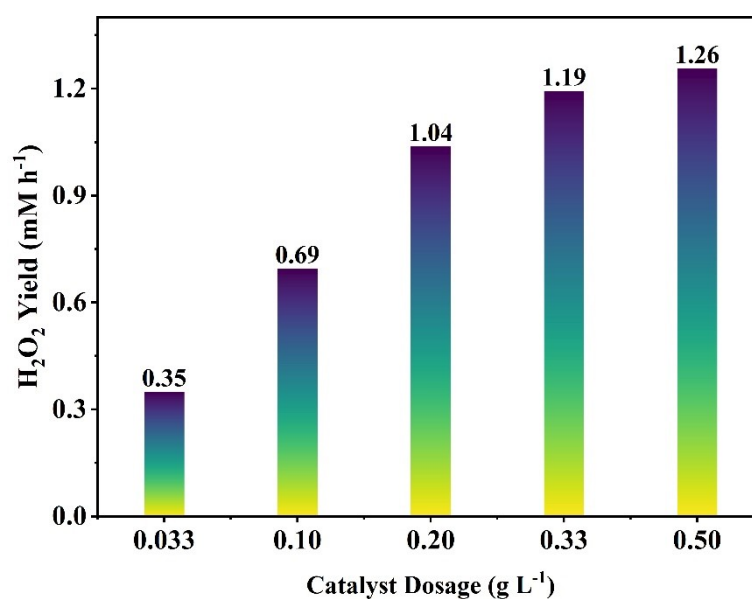

**Figure S12.** Effects of TpDa dosage on H<sub>2</sub>O<sub>2</sub> photosynthesis.

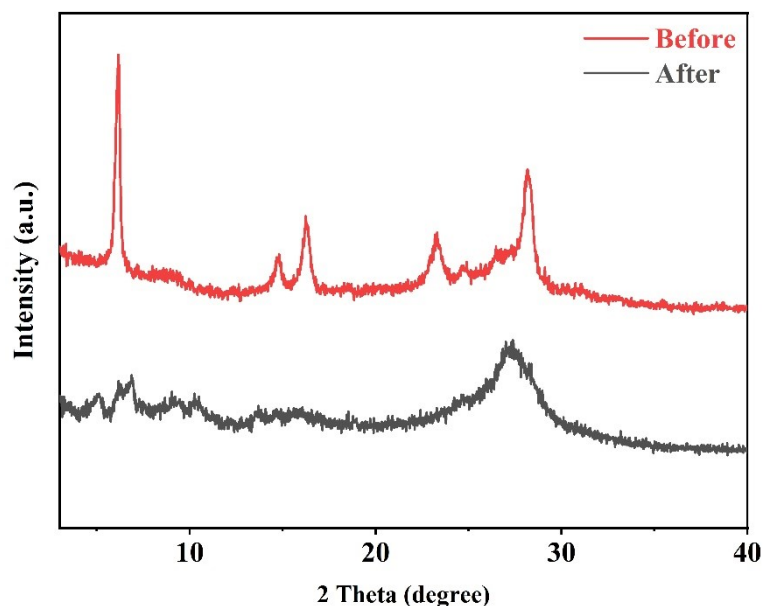

**Figure S13.** The PXRD patterns of TpDa after undergoing recycling experiments.

As shown in Figure S13, noticeable changes in the PXRD pattern are observed after the photocatalytic reaction. In particular, the characteristic diffraction peaks corresponding to the (100) and (001) planes of TpDa significantly decrease in intensity. The (100) peak reflects the in-plane periodicity of the COF framework, while the (001) peak is associated with the interlayer  $\pi$ - $\pi$  stacking along the *c*-axis. The attenuation of these peaks indicates a partial decrease in crystallinity after the photocatalytic process.

This phenomenon can be attributed to structural perturbations induced during the photocatalytic reaction, such as surface reconstruction, adsorption of reaction intermediates, or slight disorder in the interlayer stacking. Such changes can weaken the long-range ordering of the framework, resulting in reduced diffraction intensity. Importantly, the main diffraction features of TpDa are still observable, suggesting that the overall framework structure remains largely preserved after the reaction.

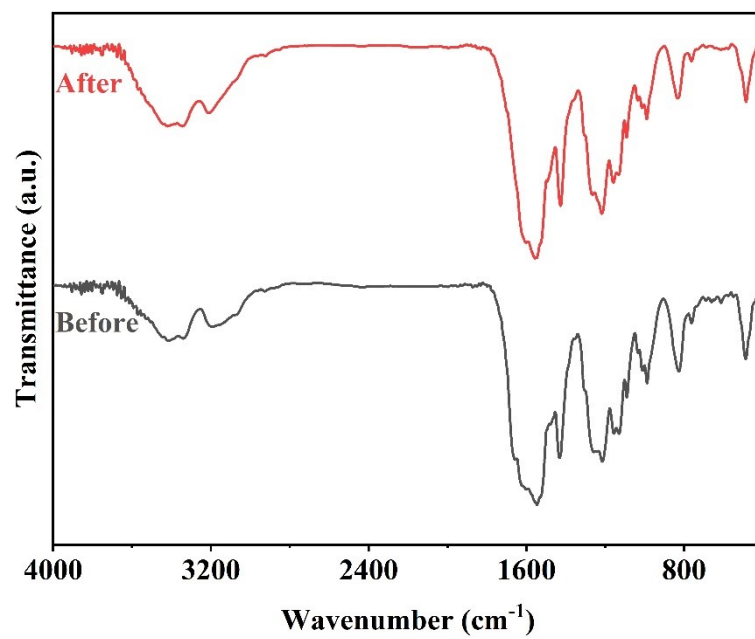

**Figure S14.** The FT-IR spectra of TpDa after undergoing recycling experiments.

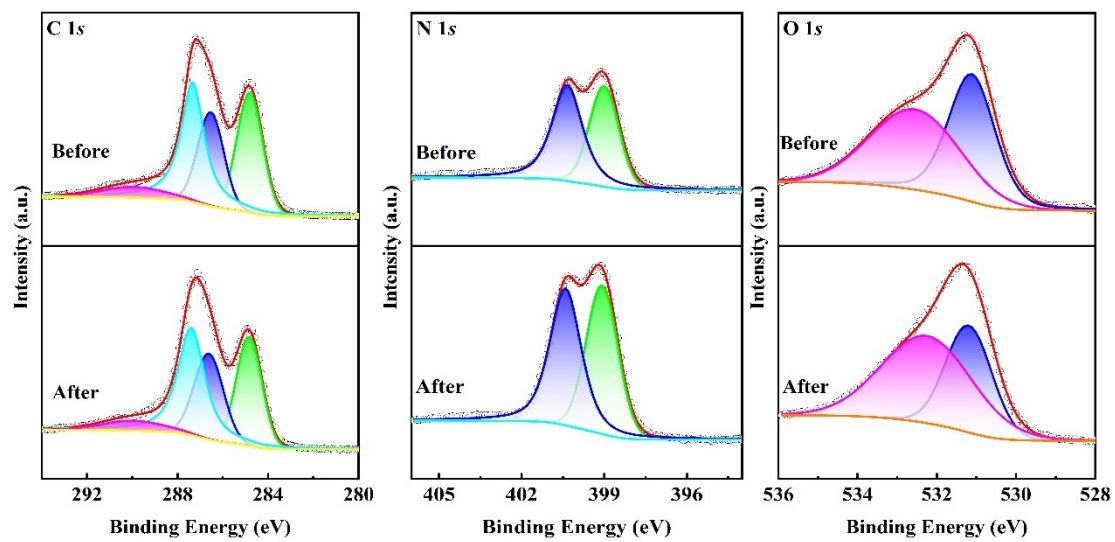

**Figure S15.** The XPS spectra of TpDa after undergoing recycling experiments.

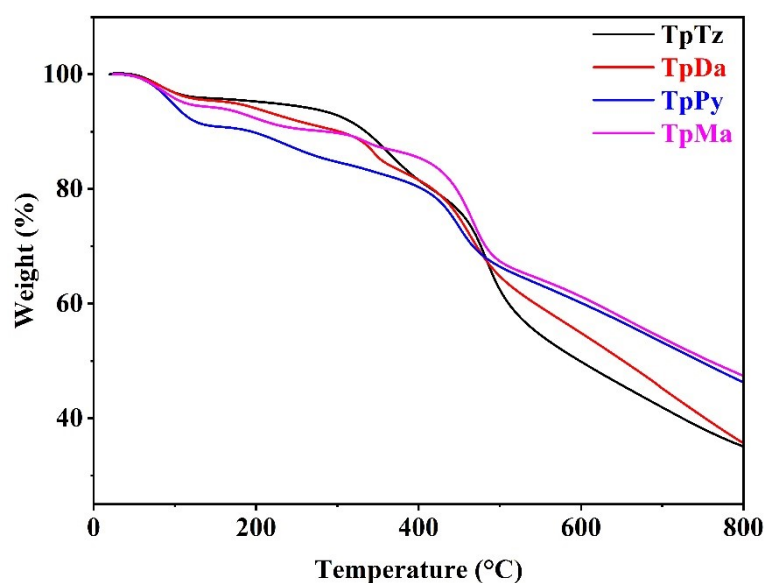

**Figure S16.** TG plots of COFs.

As shown in Figure S16, the weight loss below 150 °C can be attributed to the desorption of physically adsorbed water or residual solvents. In the temperature range of 200-300 °C, TpPy exhibits a more noticeable weight loss compared with the other COFs.

This behavior should be associated with the relatively lower crystallinity of TpPy and the presence of structurally less ordered regions within the framework. In addition, the pyridine unit introduces local electronic polarization in the framework, which may increase structural strain at edge or defect sites. As a result, these less ordered regions are more susceptible to partial decomposition upon heating around 200 °C.

In contrast, although TpMa exhibits a relatively large surface area, its benzene-based framework lacks heteroatom-induced polarization, resulting in a more uniform electronic environment and slightly higher thermal tolerance of the framework units. Therefore, the observed weight loss of TpPy in the 200-300 °C range is more reasonably attributed to the partial decomposition of less ordered or defect regions rather than the collapse of the entire framework. Significant decomposition of the COF backbones occurs only above 400 °C.

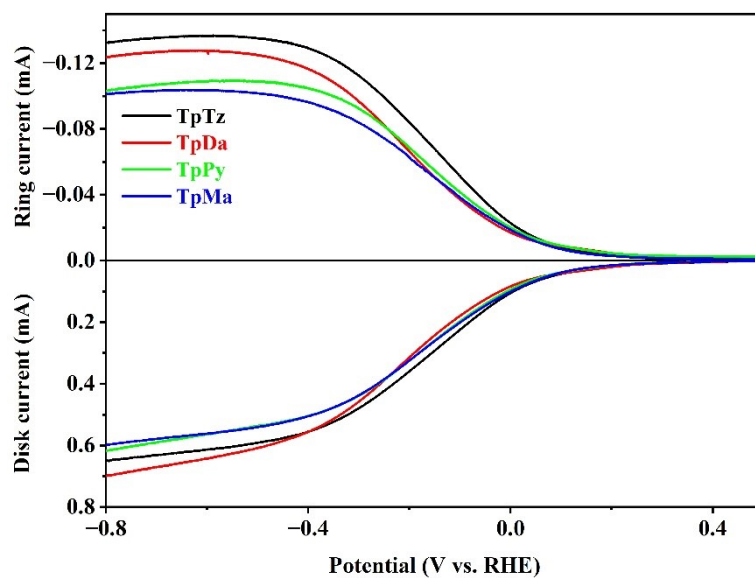

**Figure S17.** RRDE polarization curves over COFs at 1600 rpm in O<sub>2</sub>-saturated phosphate buffer solution (0.1 M pH = 6.9) with ring current (upper part) and disk current (bottom part).

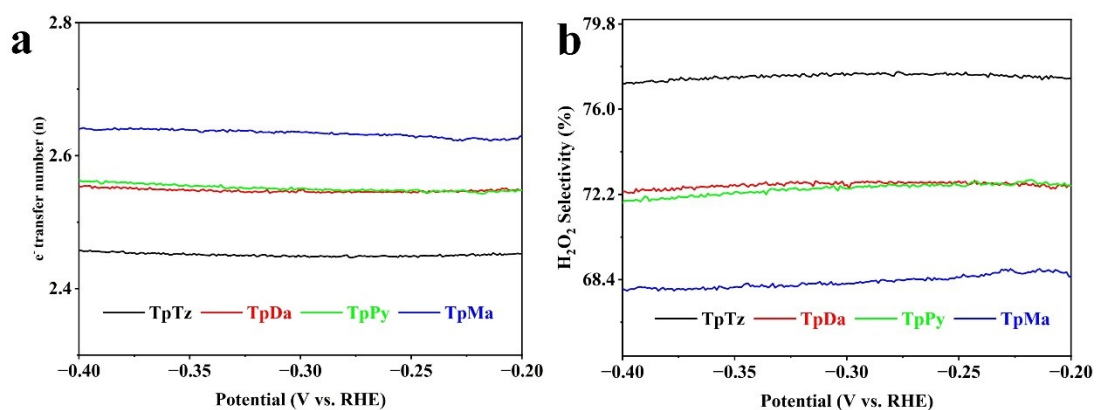

**Figure S18.** (a) The calculated average number of transferred electrons ( $n$ ) as a function of the applied potential. (b)  $H_2O_2$  selectivity as a function of the applied potential.

The RRDE measurements were repeated several times to ensure consistency, and the calculated electron transfer numbers and selectivities remained within the same range. The reported values therefore represent consistent trends among the four COFs.

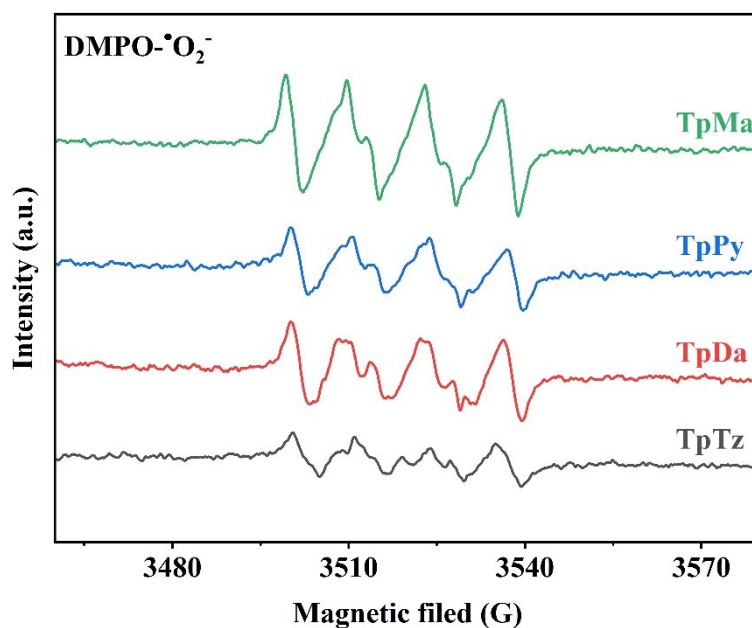

**Figure S19.** EPR profiles with DMPO for  $\cdot O_2^-$  trapping in tBA based on COFs after 5 min irradiation of visible light.

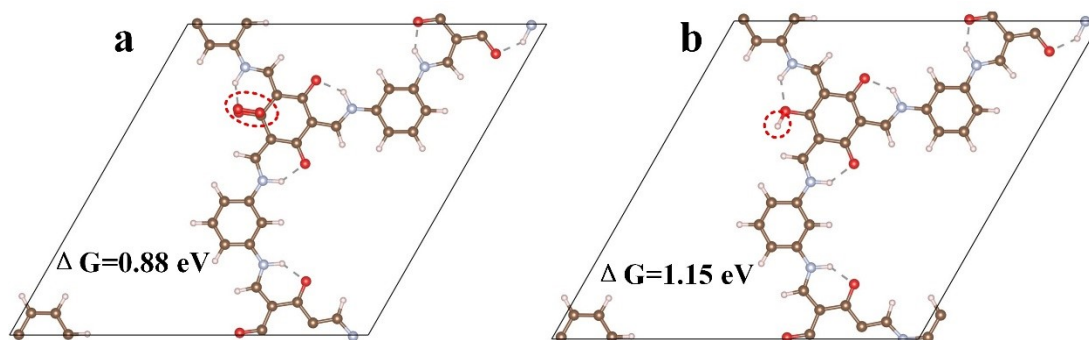

**Figure S20.** Structure snapshots and calculated reaction free energy of (a)  $O_2$  adsorption and (b)  $H^+$  adsorption on TpMa. Adsorbed species are marked with red dashed circles. The red, blue, white and brown spheres represent the O, N, H and C atoms.

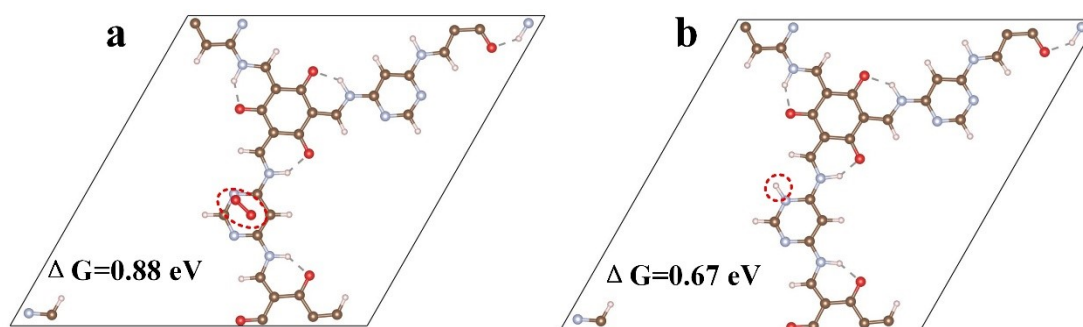

**Figure S21.** Structure snapshots and calculated reaction free energy of (a)  $O_2$  adsorption and (b)  $H^+$  adsorption on TpDa. Adsorbed species are marked with red dashed circles.

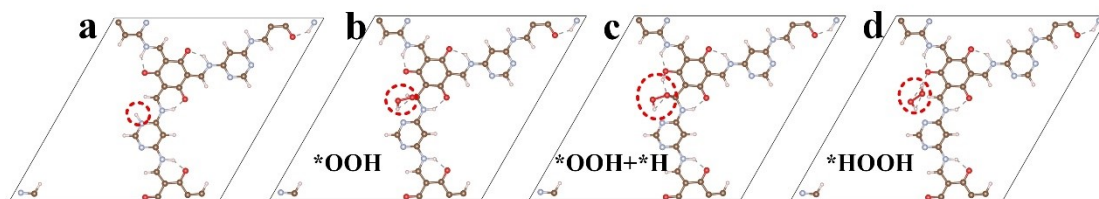

**Figure S22.** Structural snapshot of key reaction intermediates related 2e<sup>-</sup> ORR on TpDa. Adsorbed species are marked with red dashed circles.

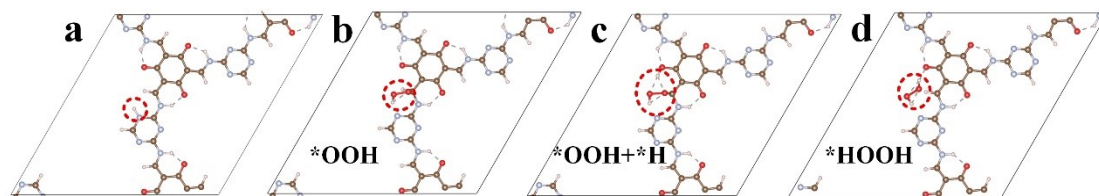

**Figure S23.** Structure snapshots of key reaction intermediates related 2e<sup>-</sup> ORR on TpTz. Adsorbed species are marked with red dashed circles.

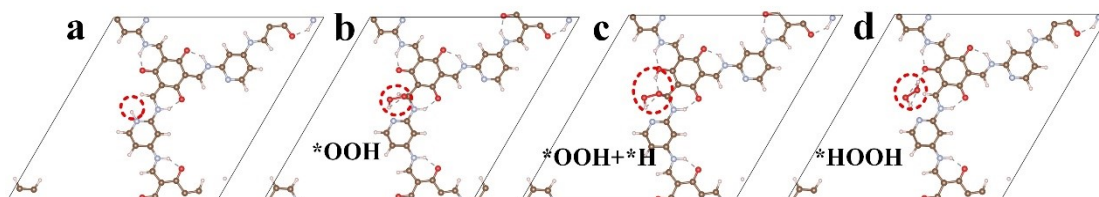

**Figure S24.** Structure snapshots of key reaction intermediates related 2e<sup>-</sup> ORR on TpPy. Adsorbed species are marked with red dashed circles.

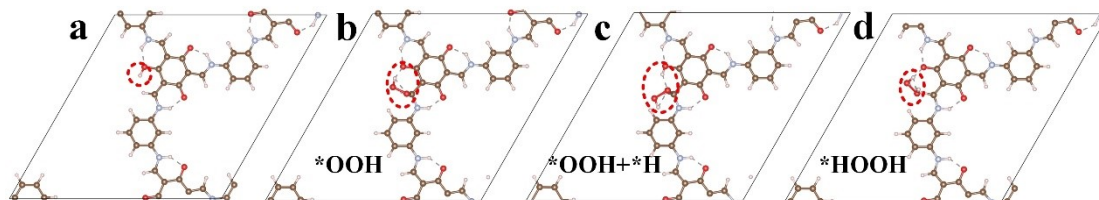

**Figure S25.** Structure snapshots of key reaction intermediates related 2e<sup>-</sup> ORR on TpMa. Adsorbed species are marked with red dashed circles.

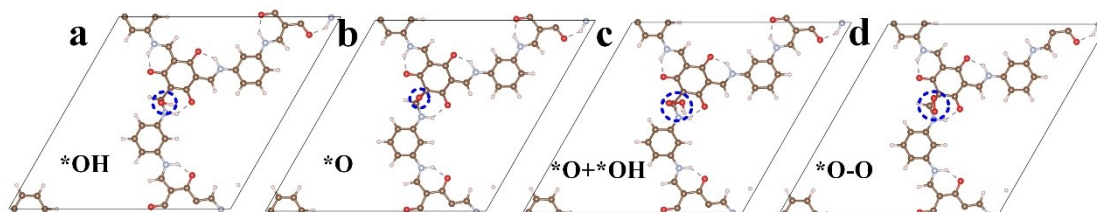

**Figure S26.** Structural snapshot of the relevant 4e<sup>-</sup> WOR key reaction intermediate at the site1 (C=C on the ketoenamine chain) of TpMa. Adsorbed species are marked with blue dashed circles.

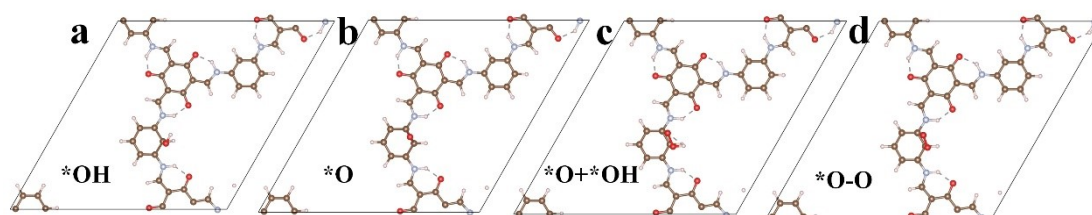

**Figure S27.** Structural snapshot of the relevant 4e<sup>-</sup> WOR key reaction intermediate at the site2 (C = C on the aromatic ring) of TpMa. Adsorbed species are marked with blue dashed circles.

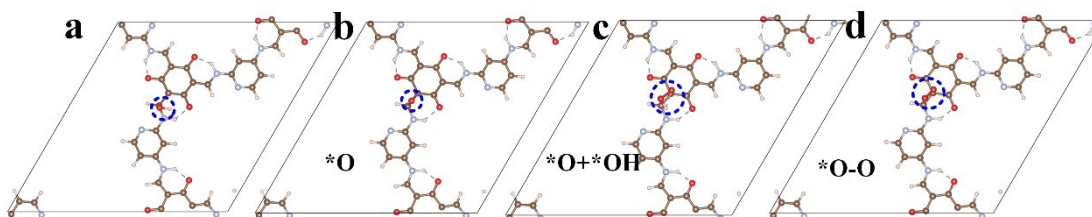

**Figure S28.** Structural snapshot of the relevant 4e<sup>-</sup> WOR key reaction intermediate at the site1 (C=C on the ketoenamine chain) of TpPy. Adsorbed species are marked with blue dashed circles.

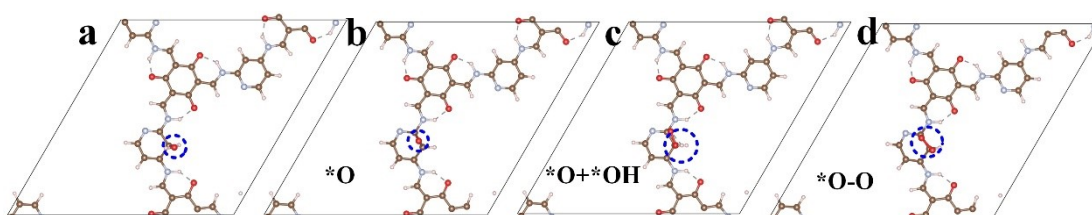

**Figure S29.** Structural snapshot of the relevant 4e<sup>-</sup> WOR key reaction intermediate at the site2 (C = C on the aromatic ring) of TpPy. Adsorbed species are marked with blue dashed circles.

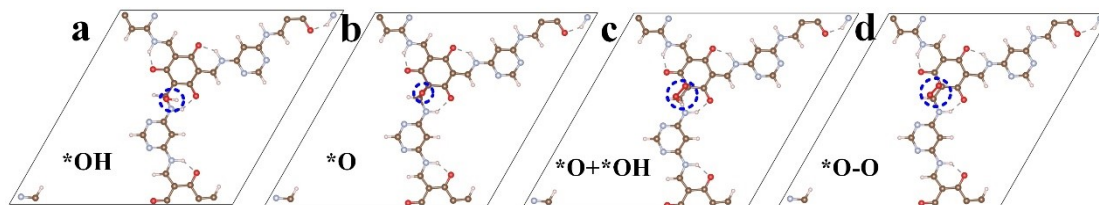

**Figure S30.** Structural snapshot of the relevant  $4e^-$  WOR key reaction intermediate at the site1 (C=C on the ketoenamine chain) of TpDa. Adsorbed species are marked with blue dashed circles.

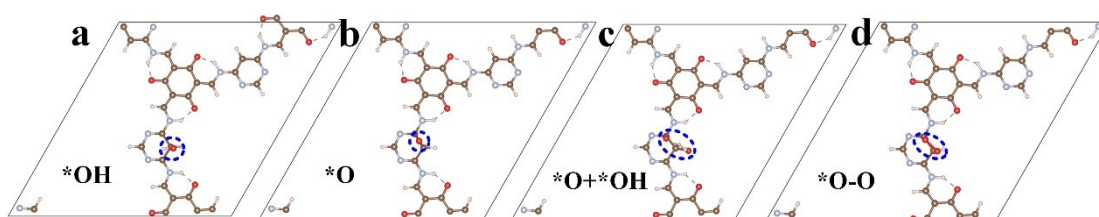

**Figure S31.** Structural snapshot of the relevant  $4e^-$  WOR key reaction intermediate at the site2 (C = C on the aromatic ring) of TpDa. Adsorbed species are marked with blue dashed circles.

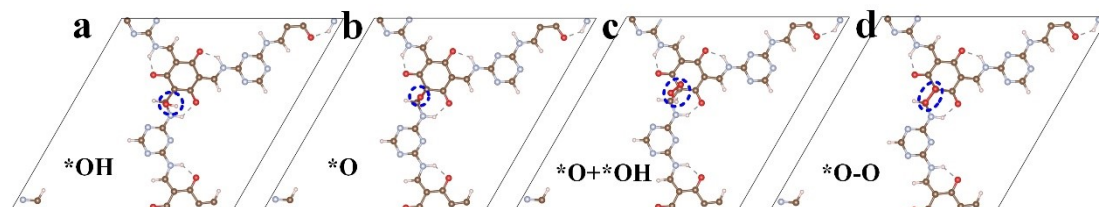

**Figure S32.** Structural snapshot of the relevant  $4e^-$  WOR key reaction intermediate of TpTz. Adsorbed species are marked with blue dashed circles.

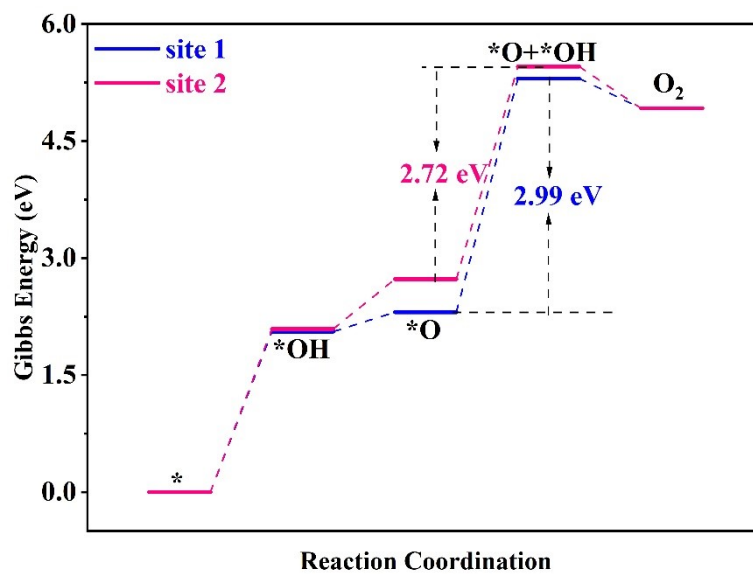

**Figure S33.** Gibbs free energy diagrams for 4 $e^-$  WOR at different sites based on TpMa.

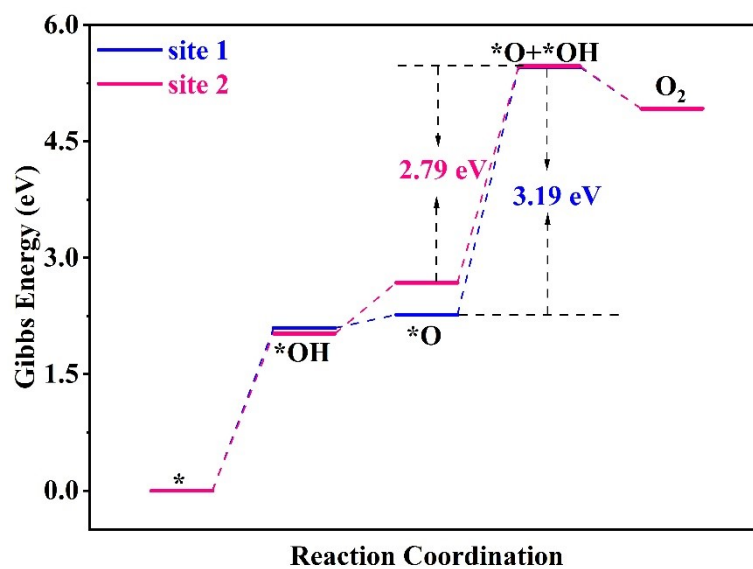

**Figure S34.** Gibbs free energy diagrams for 4 $e^-$  WOR at different sites based on TpPy.

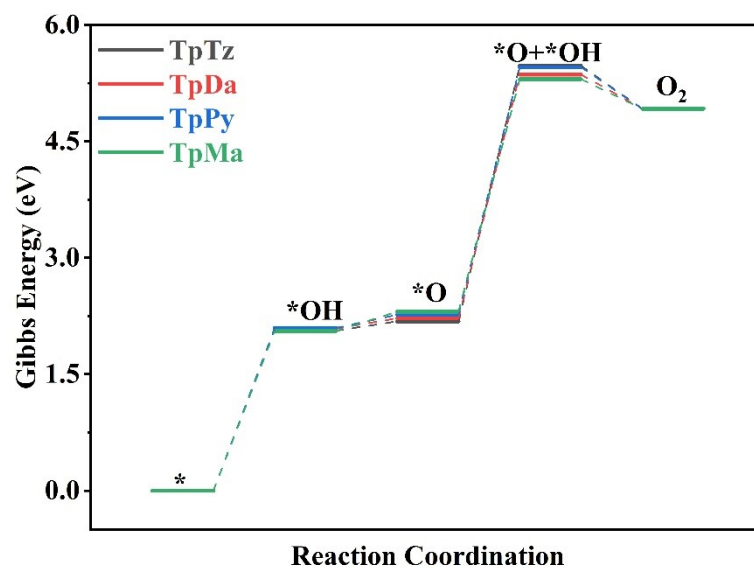

**Figure S35.** Gibbs free energy diagrams for 4e<sup>-</sup> WOR at site1 based on four COFs.

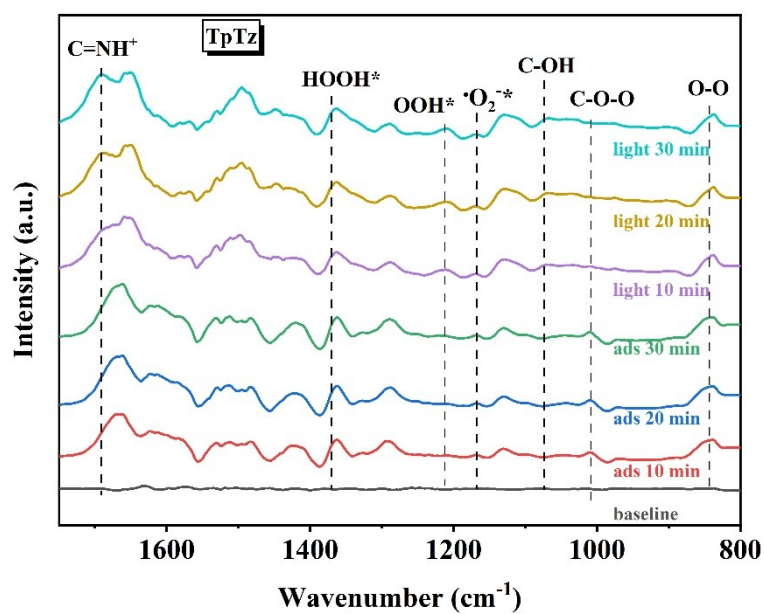

Figure S36. In situ DRIFT spectra of TpTz.

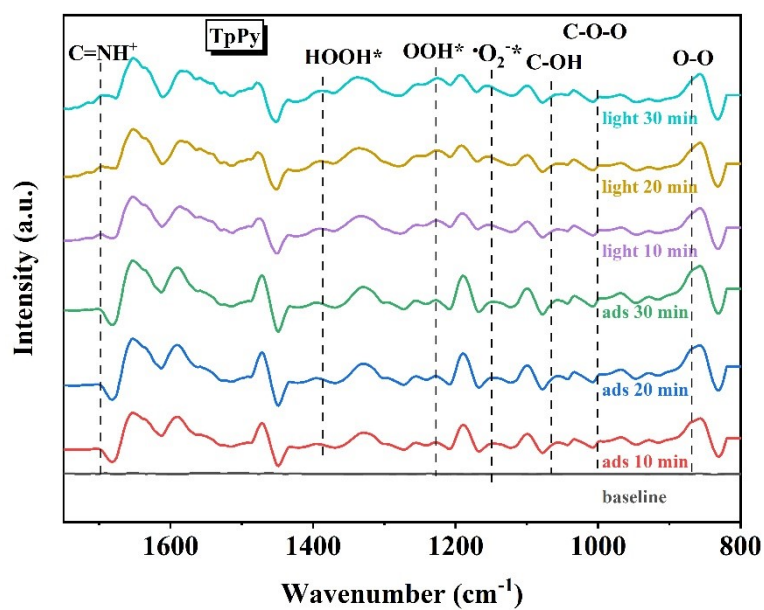

Figure S37. In situ DRIFT spectra of TpPy.

**Table S1.** Elemental content analysis of COFs obtained by Elemental Analyzer.

|      | C (wt.%) | N (wt.%) |
|------|----------|----------|
| TpTz | 45.11    | 28.55    |
| TpDa | 48.20    | 24.40    |
| TpPy | 52.53    | 16.28    |
| TpMa | 58.88    | 11.47    |

**Table S2.** Elemental content analysis of COFs obtained by XPS.

|      | C (at.%) | N (at.%) |
|------|----------|----------|
| TpTz | 56.35    | 27.9     |
| TpDa | 60.58    | 20.98    |
| TpPy | 66.77    | 16.63    |
| TpMa | 73.42    | 12.54    |

**Table S3.** Fitting parameters of time-resolved PL spectra of COFs.

| Samples | A <sub>1</sub> | τ <sub>1</sub> /ns | A <sub>2</sub> | τ <sub>2</sub> /ns | τ <sub>n</sub> /ns |
|---------|----------------|--------------------|----------------|--------------------|--------------------|
| TpTz    | 1655.32        | 0.76               | 32.40          | 17.64              | 6.02               |
| TpDa    | 1291.32        | 0.82               | 64.75          | 14.96              | 7.57               |
| TpPy    | 1481.86        | 0.40               | 36.84          | 5.00               | 1.93               |
| TpMa    | 1514.42        | 0.67               | 216.83         | 2.73               | 1.43               |

A di-exponential function fitting was employed to analyze the PL decay curves, τ<sub>n</sub> is the average PL lifetime, τ<sub>1</sub> and τ<sub>2</sub> are the estimated lifetime values and A<sub>1</sub> and A<sub>2</sub> are the corresponding amplitudes.

$$\tau_n = \frac{A_1 * \tau_1^2 + A_2 * \tau_2^2}{A_1 * \tau_1 + A_2 * \tau_2}$$

**Table S4.** The comparison of photocatalytic H<sub>2</sub>O<sub>2</sub> production performance of EBBT-COF and PBBT-COF with thus far reported photocatalysts.

| Sample                              | H <sub>2</sub> O <sub>2</sub> Yield (mmol g <sup>-1</sup> h <sup>-1</sup> ) | Irradiated conditions | AQY (%)             | Solvent                   |
|-------------------------------------|-----------------------------------------------------------------------------|-----------------------|---------------------|---------------------------|
| <b>TpDa</b>                         | <b>7.09</b>                                                                 | <b>Xenon Lamp</b>     | <b>25.2 (400nm)</b> | <b>H<sub>2</sub>O</b>     |
| CQD-CTFs <sup>13</sup>              | 1.03                                                                        | λ > 420 nm            | 1.0 (420 nm)        | H <sub>2</sub> O          |
| FS-OHOHMe-COF <sup>14</sup>         | 1.46                                                                        | λ > 420 nm            | 9.6 (420 nm)        | H <sub>2</sub> O:BA (9:1) |
| SO <sub>3</sub> H-COF <sup>15</sup> | 3.02                                                                        | λ > 400 nm            | 8.7 (400 nm)        | H <sub>2</sub> O          |
| DVA-COF <sup>16</sup>               | 3.76                                                                        | λ > 420 nm            | 2.8 (420 nm)        | H <sub>2</sub> O:BA (9:1) |
| Fe-SAS-TpPP <sup>17</sup>           | 4.13                                                                        | AM 1.5                | 6.4 (420 nm)        | H <sub>2</sub> O:BA (9:1) |
| COF-OH <sup>18</sup>                | 4.46                                                                        | λ > 400 nm            | 6.5 (400 nm)        | H <sub>2</sub> O          |
| KfAQ-COF <sup>19</sup>              | 4.78                                                                        | λ > 400 nm            | 15.8 (400 nm)       | Alkaline H <sub>2</sub> O |
| USTB-7-10 <sup>20</sup>             | 5.04                                                                        | λ > 420 nm            | 5.0 (420 nm)        | H <sub>2</sub> O          |
| TBD-COF <sup>21</sup>               | 5.45                                                                        | λ > 420 nm            | 5.7 (420 nm)        | H <sub>2</sub> O          |
| EBBT-COF <sup>22</sup>              | 5.69                                                                        | λ > 400 nm            | 15.1 (420 nm)       | H <sub>2</sub> O          |
| TAH-COF <sup>23</sup>               | 6.00                                                                        | λ > 420 nm            | 7.1 (475 nm)        | H <sub>2</sub> O          |

|                                              |      |                            |                  |                  |
|----------------------------------------------|------|----------------------------|------------------|------------------|
| TPB-COF-OH <sup>24</sup>                     | 6.61 | $\lambda > 420 \text{ nm}$ | 9.6<br>(420 nm)  | H <sub>2</sub> O |
| Tp-DPBD <sub>30</sub> -<br>COF <sup>25</sup> | 7.20 | $\lambda > 420 \text{ nm}$ | 18.0<br>(420 nm) | H <sub>2</sub> O |
| TpDz <sup>26</sup>                           | 7.33 | $\lambda > 420 \text{ nm}$ | 11.9<br>(420 nm) | H <sub>2</sub> O |
| iTPPy-COF <sup>27</sup>                      | 7.96 | $\lambda > 420 \text{ nm}$ | 8.3<br>(420 nm)  | H <sub>2</sub> O |
| DT2TA-TAPB <sup>28</sup>                     | 8.59 | $\lambda > 420 \text{ nm}$ | 3.3<br>(380 nm)  | H <sub>2</sub> O |

---

## References

1. H. Zhao, Q. Jin, M. A. Khan, S. Larter, S. Siahrostami, M. G. Kibria and J. Hu, Rational design of carbon nitride for remarkable photocatalytic H<sub>2</sub>O<sub>2</sub> production, *Chem Catal.*, 2022, **2**, 1720-1733.
2. C. Feng, J. Luo, C. Chen, S. Zuo, Y. Ren, Z.-P. Wu, M. Hu, S. Ould-Chikh, J. Ruiz-Martínez, Y. Han and H. Zhang, Cooperative tungsten centers in polymeric carbon nitride for efficient overall photosynthesis of hydrogen peroxide, *Energy Environ. Sci.*, 2024, **17**, 1520-1530.
3. Y. Hou, P. Zhou, F. Liu, Y. Lu, H. Tan, Z. Li, M. Tong and J. Ni, Efficient Photosynthesis of Hydrogen Peroxide by Cyano-Containing Covalent Organic Frameworks from Water, Air and Sunlight, *Angew. Chem. Int. Ed.*, 2024, **63**, e202318562.
4. Z. Teng, Q. Zhang, H. Yang, K. Kato, W. Yang, Y.-R. Lu, S. Liu, C. Wang, A. Yamakata, C. Su, B. Liu and T. Ohno, Atomically dispersed antimony on carbon nitride for the artificial photosynthesis of hydrogen peroxide, *Nat. Catal.*, 2021, **4**, 374-384.
5. G. Kresse and J. Hafner, Ab initio molecular dynamics for liquid metals, *Physical review B*, 1993, **47**, 558.
6. G. Kresse and J. Hafner, Ab initio molecular-dynamics simulation of the liquid-metalamorphous-semiconductor transition in germanium, *Physical Review B*, 1994, **49**, 14251-14269.
7. G. Kresse, From ultrasoft pseudopotentials to the projector augmented-wave method, *Physical Review B - Condensed Matter and Materials Physics*, 1999, **59**, 1758-1775.
8. J. P. Perdew, K. Burke and M. Ernzerhof, Generalized gradient approximation made simple, *Phys. Rev. Lett.*, 1996, **77**, 3865.
9. S. Grimme, J. Antony, S. Ehrlich and H. Krieg, A consistent and accurate ab initio parametrization of density functional dispersion correction (DFT-D) for the 94 elements H-Pu, *The Journal of chemical physics*, 2010, **132**, 154104.
10. F. Neese, F. Wennmohs, U. Becker and C. Riplinger, The ORCA quantum chemistry program package, *The Journal of Chemical Physics*, 2020, **152**, 224108.
11. T. Lu, A comprehensive electron wavefunction analysis toolbox for chemists, Multiwfn, *The Journal of Chemical Physics*, 2024, **161**, 082503.
12. W. Humphrey, A. Dalke and K. Schulten, VMD: Visual molecular dynamics, *J. Mol. Graphics*, 1996, **14**, 33-38.
13. Y. Yang, Q. Guo, Q. Li, L. Guo, H. Chu, L. Liao, X. Wang, Z. Li and W. Zhou, Carbon Quantum Dots Confined into Covalent Triazine Frameworks for Efficient Overall Photocatalytic H<sub>2</sub>O<sub>2</sub> Production, *Adv. Funct. Mater.*, 2024, **34**, 2400612.
14. C. Shu, X. Yang, L. Liu, X. Hu, R. Sun, X. Yang, A. I. Cooper, B. Tan and X. Wang, Mixed-Linker Strategy for the Construction of Sulfone-Containing D–A–A Covalent Organic Frameworks for Efficient Photocatalytic Hydrogen Peroxide Production, *Angew. Chem. Int. Ed.*, 2024, **63**, e202403926.
15. L. Li, X. Lv, Y. Xue, H. Shao, G. Zheng and Q. Han, Custom-Design of Strong Electron/Proton Extractor on COFs for Efficient Photocatalytic H<sub>2</sub>O<sub>2</sub> Production, *Angew. Chem. Int. Ed.*, 2024, **63**, e202320218.
16. H. Yu, F. Zhang, Q. Chen, P.-K. Zhou, W. Xing, S. Wang, G. Zhang, Y. Jiang and X. Chen, Vinyl-Group-Anchored Covalent Organic Framework for Promoting the Photocatalytic Generation of Hydrogen Peroxide, *Angew. Chem. Int. Ed.*, 2024, **63**, e202402297.
17. Z. Li, X. Shi, H. Cheng, Y. Song, Y. Jiao, S. Shi, J. Gao and J. Hou, Atomically Dispersed Iron Active Sites on Covalent Organic Frameworks for Artificial Photosynthesis of Hydrogen Peroxide, *Adv. Energy Mater.*, 2024, **14**, 2302797.
18. M. Guo, C. He, Z. Wu, Y. Tian, J. Yang, Y. Wang, H. Wu, J. Yang, M. Xu, W. Xue, C. Cheng, S. Li and C.

- Zhao, Micro-Environment Programmable Quinoline COFs for High-Performance Photocatalytic H<sub>2</sub>O<sub>2</sub> Generation and Benzylamine Coupling, *Adv. Sci.*, 2025, **12**, e05794.
19. X. Zhang, S. Cheng, C. Chen, X. Wen, J. Miao, B. Zhou, M. Long and L. Zhang, Keto-anthraquinone covalent organic framework for H<sub>2</sub>O<sub>2</sub> photosynthesis with oxygen and alkaline water, *Nat. Commun.*, 2024, **15**, 2649.
20. X. Ding, T. Wang, B. Yu, Q. Zhi, H. Wang, H. Liu, P. A. Stuzhin and J. Jiang, 10% Conversion of Imine into Thiazole in Covalent Organic Frameworks for Efficient Photocatalytic H<sub>2</sub>O<sub>2</sub> Generation, *Adv. Funct. Mater.*, 2025, **35**, 2422291.
21. J.-Y. Yue, J.-X. Luo, Z.-X. Pan, R.-Z. Zhang, P. Yang, Q. Xu and B. Tang, Regulating the Topology of Covalent Organic Frameworks for Boosting Overall H<sub>2</sub>O<sub>2</sub> Photogeneration, *Angew. Chem. Int. Ed.*, 2024, **63**, e202405763.
22. B. Li, J. Chen, K. Wang, D. Qi, T. Wang and J. Jiang, Ethynyl-Linked Donor–Acceptor Covalent Organic Framework for Highly Efficient Photocatalytic H<sub>2</sub>O<sub>2</sub> Production, *Adv. Energy Mater.*, 2025, **15**, 2404497.
23. T. Xu, Z. Wang, W. Zhang, S. An, L. Wei, S. Guo, Y. Huang, S. Jiang, M. Zhu, Y.-B. Zhang and W.-H. Zhu, Constructing Photocatalytic Covalent Organic Frameworks with Aliphatic Linkers, *Journal of the American Chemical Society*, 2024, **146**, 20107-20115.
24. S. Feng, H. Cheng, F. Chen, X. Liu, Z. Wang, H. Xu and J. Hua, Rational Design of Covalent Organic Frameworks with Redox-Active Catechol Moieties for High-Performance Overall Photosynthesis of Hydrogen Peroxide, *ACS Catal.*, 2024, **14**, 7736-7745.
25. Y. Chen, R. Liu, Y. Guo, G. Wu, T. C. Sum, S. W. Yang and D. Jiang, Hierarchical assembly of donor–acceptor covalent organic frameworks for photosynthesis of hydrogen peroxide from water and air, *Nat. Synth.*, 2024, **3**, 998-1010.
26. Q. Liao, Q. Sun, H. Xu, Y. Wang, Y. Xu, Z. Li, J. Hu, D. Wang, H. Li and K. Xi, Regulating Relative Nitrogen Locations of Diazine Functionalized Covalent Organic Frameworks for Overall H<sub>2</sub>O<sub>2</sub> Photosynthesis, *Angew. Chem. Int. Ed.*, 2023, **62**, e202310556.
27. J. Zhang, F. Xue and Z. Wang, Terpyridine- and Quarterpyridine-Based Cationic Covalent Organic Frameworks for Visible-Light-Catalytic H<sub>2</sub>O<sub>2</sub> Synthesis, *Angew. Chem. Int. Ed.*, 2025, **64**, e202425617.
28. Y. Ju, H. Lin, G. Tan, P. Su, Z. Wang, C. Hu, R. Hou, T. Hao, F. Chen and Y. Tang, Regulating the electronic structure of covalent organic frameworks via heterocyclic isomers for highly efficient photocatalytic H<sub>2</sub>O<sub>2</sub> generation, *Nat. Commun.*, 2025, **16**, 5658.
